# Supplementary material for: Stage-Specific Effects of Ionizing Radiation during Early Development
Source: MDPI journal article supplement (doi:10.3390/ijms21113975), 2020-06-01
Supplement: s1 [file s1]

**Supplementary Table S1.** The difference of cellular response to ionizing radiation among species. +: effective; -: defective; N.D.: Not Determined.

| <b>Species</b> | <b>Cell Cycle Checkpoints</b>             | <b>Predominant DNA Repair Pathway</b> | <b>Apoptosis</b>                          |
|----------------|-------------------------------------------|---------------------------------------|-------------------------------------------|
| Mammals        | G1/S checkpoint: -<br>G2/M checkpoint: +  | Homologous recombination              | From two-cell stage in mouse              |
| Xenopus        | After midblastula transition              | N.D.                                  | After onset of gastrulation               |
| Fish           | After midblastula transition in zebrafish | N.D.                                  | After mid-gastrulation stage in zebrafish |
